# Supplementary material for: B-Cell-Intrinsic Type 1 Interferon Signaling Is Crucial for Loss of Tolerance and the Development of Autoreactive B Cells
Source: PubMed Central journal article supplement — Cell Rep. Author manuscript; Available in PMC 2018 Aug 13. (PMC6089613; doi:10.1016/j.celrep.2018.06.046), 2018-07-10
Supplement: NIHMS1500942-supplement-1.pdf [file NIHMS1500942-supplement-1.pdf]

**Cell Reports, Volume 24**

**Supplemental Information**

**B-Cell-Intrinsic Type 1 Interferon Signaling Is  
Crucial for Loss of Tolerance  
and the Development of Autoreactive B Cells**

**Phillip P. Domeier, Sathi Babu Chodisetti, Stephanie L. Schell, Yuka Imamura  
Kawasawa, Melinda J. Fasnacht, Chetna Soni, and Ziaur S.M. Rahman**

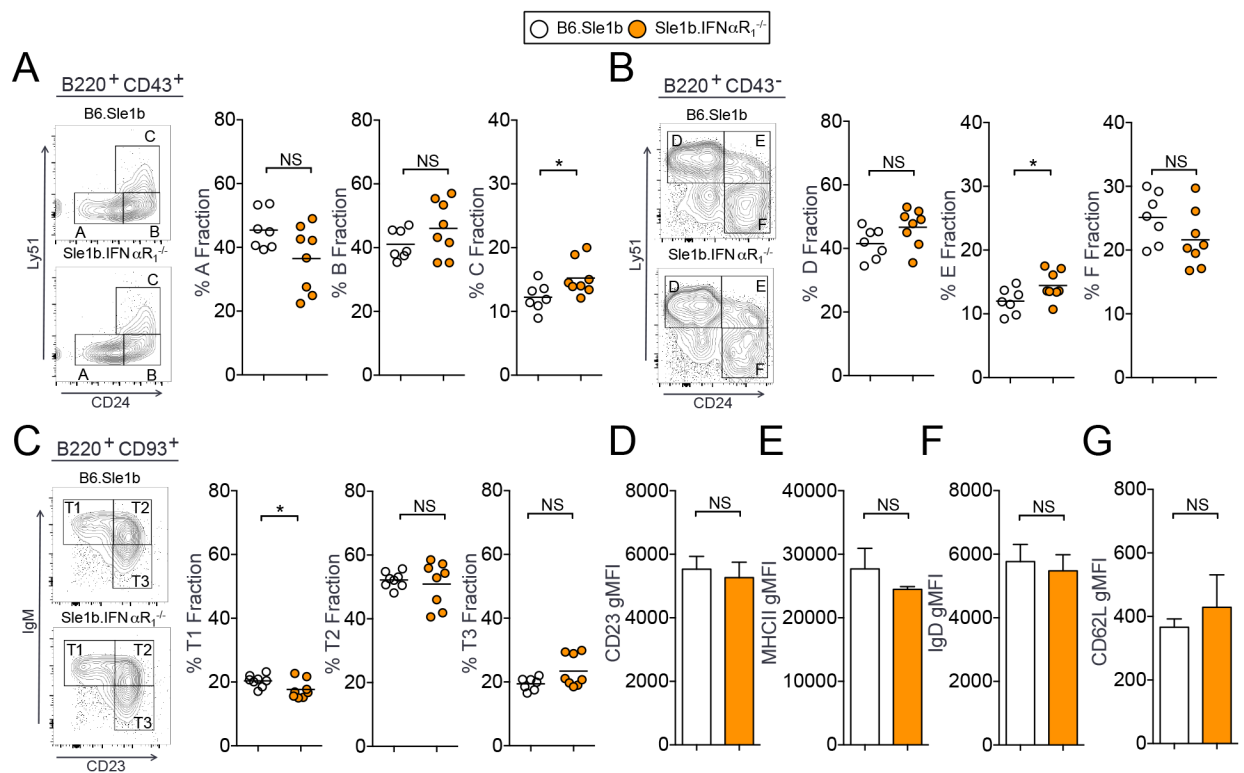

**Figure S1. IFN $\alpha$ R $_1$  signaling does not overtly affect B cell development. Related to Figure 1.**

(A-B) Flow cytometric analysis of bone marrow cells for B cell developmental fractions A (B220 $^+$ CD43 $^+$ CD24 $^-$ Ly-51 $^-$ ), B (B220 $^+$ CD43 $^+$ CD24 $^+$ Ly-51 $^-$ ), C (B220 $^+$ CD43 $^+$ CD24 $^+$ Ly-51 $^+$ ), D (B220 $^+$ CD43 $^-$ CD93 $^+$ IgM $^-$ ), E (B220 $^+$ CD43 $^-$ CD93 $^+$ IgM $^+$ ) and F (B220 $^+$ CD43 $^-$ CD93 $^-$ IgM $^+$ ). (C) Flow cytometric analysis of total splenocytes for B cell developmental stages such as T1 (B220 $^+$ CD93 $^+$ CD23 $^-$ IgM $^+$ ), T2 (B220 $^+$ CD93 $^+$ CD23 $^+$ IgM $^+$ ) and T3 (B220 $^+$ CD93 $^+$ CD23 $^+$ IgM $^{low}$ ). (D-G) Flow cytometric analysis of surface expression of CD23 (D), MHCII (E), IgD (F), and CD62L (G) on total B220 $^+$  splenocytes. For A-C, each symbol represents a mouse and horizontal lines indicate mean values. For D-G, bars indicate mean gMFI values  $\pm$  SD for at least 3 mice per group. Statistical significance was determined using an unpaired, nonparametric Mann-Whitney Student's *t*-test (\*,  $p < 0.05$ , NS, not significant).

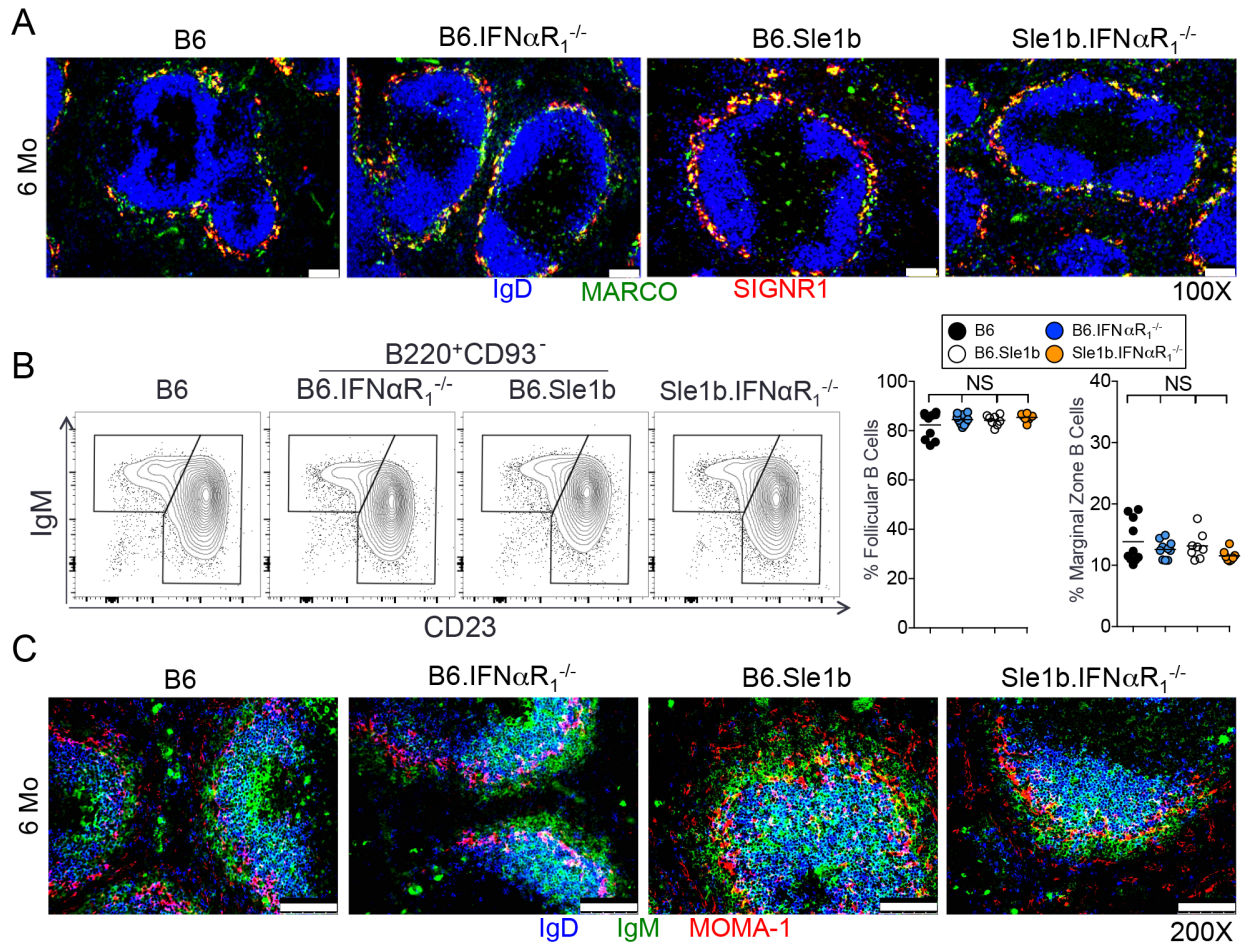

**Figure S2.** IFN $\alpha$ R $_1$  signaling does not regulate the MZ compartment in B6.Sle1b mice. Related to Figures 1 and 2.

(A) Representative spleen sections from 6 mo old female mice of the indicated genotypes were stained with anti-IgD (blue), anti-MARCO (green) and anti-SIGNR1 (red) to show MARCO $^{+}$ SIGNR1 $^{+}$  marginal zone macrophage (MZM) compartment. Bars, 100  $\mu$ M. (B) Flow cytometric analysis of total splenocytes to quantitate the percentage of follicular (B220 $^{+}$ CD23 $^{+}$ CD93 $^{-}$ IgM $^{int}$ ) and marginal zone (B220 $^{+}$ CD23 $^{-}$ CD93 $^{-}$ IgM $^{hi}$ ) B cells. Each symbol represents a mouse and horizontal lines indicate mean values. Statistical significance was determined using an unpaired, nonparametric Mann-Whitney Student's t test (NS, not significant). (C) Representative spleen sections from 6 mo old female mice of the indicated genotypes were stained with anti-IgD (blue), anti-IgM (green) and anti-MOMA-1 (red) to show marginal zone compartment (IgD $^{-}$ IgM $^{hi}$ ) structures. Bars, 100  $\mu$ M.

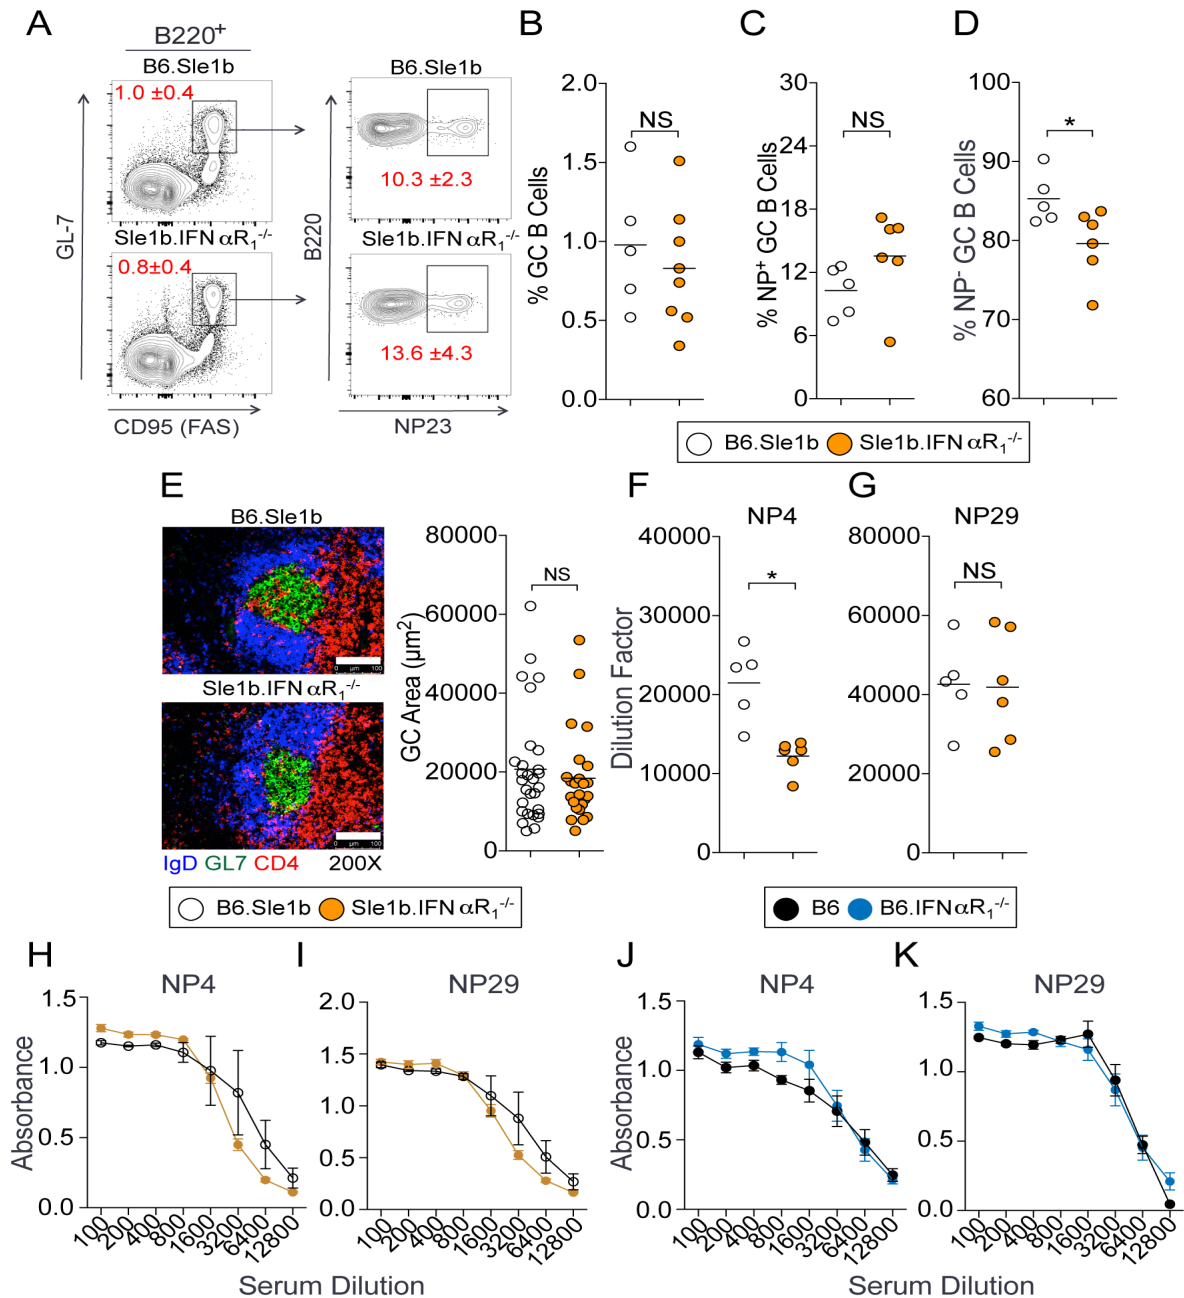

**Figure S3. IFN $\alpha$ R1 is not required for high affinity antibody production in B6.Sle1b mice over time. Related to Figures 1 and 2.**

(A and B) B6.Sle1b and B6.Sle1b.IFN $\alpha$ R1<sup>-/-</sup> mice were immunized with NP-CGG. Flow cytometric analysis was performed at 14d post-immunization to quantitate the percentage of total B220<sup>+</sup>GL-7<sup>hi</sup>Fas<sup>hi</sup> GC B cells (A left panel and B), NP<sup>+</sup>B220<sup>+</sup>GL-7<sup>hi</sup>Fas<sup>hi</sup> GC B cells (A right panel and C) and NP<sup>+</sup>B220<sup>+</sup>GL-7<sup>hi</sup>Fas<sup>hi</sup> GC B cells (D). E- left panels, spleen sections from these mice were stained with anti-IgD (blue), GL7 (green) and anti-CD4 (red). Bars, 100  $\mu$ M. E-right panels, GC areas were measured in stained spleen sections. Analysis of NP4- (F, H) and NP29-specific (G, I) serum IgG titers in B6.Sle1b and B6.Sle1b.IFN $\alpha$ R1<sup>-/-</sup> mice 14d and 30d post-NP-CGG immunization. Analysis of NP4- (J) and NP29-specific (K) IgG titers in B6 and B6.IFN $\alpha$ R1<sup>-/-</sup> mice 30d post-NP-CGG immunization. Each symbol represents a mouse and horizontal lines indicate mean values. Statistical significance was determined using an unpaired, nonparametric Mann-Whitney Student's *t*-test (NS, not significant, \*, *p* < 0.05).

Supplemental Table 1.

| Ingenuity Canonical Pathways           | -log(p-value) | Ratio | Molecules                                                          |
|----------------------------------------|---------------|-------|--------------------------------------------------------------------|
| Cytokine/Chemokine Pathways            |               |       |                                                                    |
| IL-2 Signaling                         | 1.310         | 0.063 | PIK3R3,STAT5A,FRS2,IL2RG                                           |
| IL-3 Signaling                         | 2.680         | 0.084 | PIK3R3,INPP5D,STAT1,STAT5A,FRS2,PPP3CB,PPP3CA                      |
| IL-4 Signaling                         | 2.510         | 0.079 | NFATC3,PIK3R3,INPP5D,HLA-DQB1,FRS2,IL4R,IL2RG                      |
| IL-9 Signaling                         | 3.410         | 0.133 | NFKB1,PIK3R3,STAT1,STAT5A,FRS2,IL2RG                               |
| IL-10 Signaling                        | 1.230         | 0.059 | NFKB1,IL10RB,IL18RAP,IL4R                                          |
| IL-15 Signaling                        | 1.620         | 0.066 | NFKB1,PIK3R3,STAT5A,FRS2,IL2RG                                     |
| IL-22 Signaling                        | 1.840         | 0.125 | IL10RB,STAT1,STAT5A                                                |
| B Cell Activating Factor Signaling     | 1.260         | 0.075 | NFATC3,NFKB1,MAP3K1                                                |
| Interferon Signaling                   | 1.380         | 0.083 | IFNAR2,STAT1,IFNAR1                                                |
| Integrin Signaling                     | 0.991         | 0.037 | ARPC2,PIK3R3,CAPN5,FRS2,TSPAN5,PIKFYVE,CRK,CAPN7                   |
| CXCR4 Signaling                        | 0.419         | 0.012 | GNG5,KL                                                            |
| Costimulation                          |               |       |                                                                    |
| iCOS-iCOSL Signaling in T Helper Cells | 3.500         | 0.082 | NFATC3,GRAP2,NFKB1,PIK3R3,INPP5D,HLA-DQB1,FRS2,PPP3CB,PPP3CA,IL2RG |
| BCR Signaling                          |               |       |                                                                    |
| B Cell Receptor Signaling              | 1.720         | 0.049 | NFATC3,NFKB1,PIK3R3,INPP5D,MAP3K1,FRS2,PPP3CB,PPP3CA,MEF2C         |
| PI3K Signaling in B Lymphocytes        | 1.230         | 0.047 | NFATC3,NFKB1,INPP5D,PPP3CB,IL4R,PPP3CA                             |
| Calcium Signaling                      | 0.729         | 0.034 | NFATC3,PPP3CB,MYH10,PPP3CA,PRKACB,MEF2C                            |
| PTEN Signaling                         | 0.976         | 0.017 | SHARPIN,CDKN1B                                                     |
| Cellular Pathways                      |               |       |                                                                    |
| Apoptosis Signaling                    | 0.900         | 0.045 | NFKB1,CAPN5,CAPN7,CASP8                                            |
| Autophagy                              | 1.080         | 0.033 | ATG4C,CTSH                                                         |
| Actin Cytoskeleton Signaling           | 0.653         | 0.031 | ARPC2,PIK3R3,FN1,FRS2,MYH10,PIKFYVE,CRK                            |
| Glycogen Degradation III               | 1.620         | 0.071 | MGAM                                                               |
| Cdc42 Signaling                        | 1.460         | 0.012 | CD3D,LIMK1                                                         |
| Transcription Factors                  |               |       |                                                                    |
| NF- $\kappa$ B Signaling               | 1.020         | 0.039 | EIF2AK2,NFKB1,PIK3R3,MAP3K1,FRS2,PRKACB,CASP8                      |
| Disease Associated Pathways            |               |       |                                                                    |
| Systemic Lupus Erythematosus Signaling | 0.272         | 0.022 | NFATC3,PIK3R3,LSM6,INPP5D,FRS2                                     |

**Table S1. Ingenuity Canonical Pathway Analysis of B6.*Sle1b* and B6.*Sle1b*.IFN $\alpha$ R1<sup>-/-</sup> non-GC and GC B cells. Related to Figure 5.**

Differentially expressed genes shown in Figure 5A were processed by *Ingenuity Pathway Analysis*. Representative canonical pathways as identified by *Ingenuity* software are shown for differentially expressed genes.

## Supplemental Experimental Procedures

### *RNA Sequencing*

B220<sup>+</sup>Fas<sup>hi</sup>PNA<sup>hi</sup> spontaneous GC B cells and B220<sup>+</sup>Fas<sup>low</sup>PNA<sup>low</sup> non-GC B cells from the indicated mouse strains were sorted with a FACS Aria Sorter (BD Biosciences). RNA was extracted from sorted cells by TRIzol as per the manufacturer's instructions (Ambion, Grand Island, NY). Optical density values of extracted RNA were measured using NanoDrop (Thermo Fisher Scientific, Waltham, MA) to confirm an A260:A280 ratio above 1.9. RNA integrity number (RIN) was measured using BioAnalyzer (Agilent Technologies, Santa Clara, CA) RNA 6000 Pico Kit to confirm RIN above 7. The cDNA libraries were prepared using the Ovation RNA-seq System V2 (NuGEN, San Carlos, CA) as per the manufacturer's instructions. The unique barcode sequences were incorporated in the adaptors for multiplexed high-throughput sequencing. The final product was assessed for its size distribution and concentration using BioAnalyzer High Sensitivity DNA Kit (Agilent Technologies) and then loaded onto TruSeq SR v3 flow cells on an Illumina HiSeq 2500 (Illumina, San Diego, CA) and run for 100 cycles using a paired-read recipe (TruSeq SBS Kit v3, Illumina) according to the manufacturer's instructions. Illumina CASAVA pipeline (released version 1.8, Illumina) was used to obtain de-multiplexed sequencing reads (fastq files) passed the default purify filter. Additional quality filtering used FASTX-Toolkit ([http://hamnonlab.cshl.edu/fastx\\_toolkit](http://hamnonlab.cshl.edu/fastx_toolkit)) to keep only reads that have at least 80% of bases with a quality score of 20 or more (conducted by `fastq_quality_filter` function) and reads left with 10 bases or longer after being end-trimmed with a base quality score of 20 (conducted by `fastq_quality_trimmer` function). A bowtie2 index was built for the mouse reference genome (GRCm38) using bowtie version 2.1.0. The RNA-seq reads of each of the 38 samples were mapped using Tophat version 2.0.9 (Trapnell and Salzberg, 2009) supplied by Ensembl annotation file; GRCm38.78.gtf. Gene expression values were computed using fragments per kilo base per million mapped reads (FPKM) values. Differential gene expression was determined using Cuffdiff tool which is available in Cufflinks version 2.2.1 (Trapnell et al., 2010) supplied by GRCm38.78.gtf. Normalization was performed via the median of the geometric means of fragment counts across all libraries, as described in (Anders and Huber, 2010). Statistical significance was assessed using a false discovery rate (FDR) threshold of 0.05. Genes that were expressed at  $\geq 2$ -fold differences between GC B cells and non-GC B cells were sorted by hierarchical clustering using Cluster 3.0 software (Version 1.54) and heatmaps were generated using TreeView software (Version 1.1 6r4) (Saldanha, 2004).

### *Flow cytometry*

Flow cytometric analysis of mouse splenocytes or bone marrow cells was performed using the following antibodies: PacBlue-anti-B220 (RA3-6B2); Alexa Fluor 700-anti-CD4 (RM4-5); PE-anti-PD-1 (29F.1A12); Cy5-anti-CD86 (GL1); PeCy7-anti-CD95 (FAS, Jo2); PeCy7-anti-MHC-II (M5/114.15.2); APC-anti-CD24 (HSA) (M1/69); Biotin-anti-Ly5.1 (BP-1) (6C3); FITC-anti-CD23 (B3B4) and PE-Cy5-streptavidin (SA) were purchased from BioLegend, San Diego, CA. Biotin-anti-CXCR5 (2G8) from BD Pharmingen, San Diego, CA. FITC-peanut agglutinin (PNA) from Vector Labs, Burlingame, CA. PE-anti-IgM (eB121-15F9); APC anti-CD93 (AA4.1); FITC-anti-F4/80 (BM8) from eBiosciences, San Diego, CA. Stained cells were analyzed using the BD LSR II flow cytometer (BD Biosciences, Franklin lakes, NJ). Data were acquired using FACSDiva software (BD Biosciences, San Jose, CA) and analyzed using FlowJo software (Tree Star, San Carlos, CA).

### *Immunohistology*

Immunohistochemical analysis of mouse spleen sections was performed using the following antibodies and reagents: PE-anti-CD4 (GK1.5); FITC-GL7; APC-anti-IgD (11-26c.2a) (all from BD Biosciences); SIGNR1 (hamster Ab-eBioscience; clone ebio22D1); MOMA-1 (Abcam, Cambridge, MA); E4-biotin (made in house); Streptavidin-PE (Sigma Aldrich, St. Louis, MO). Spleen cryostat sections (5-6  $\mu$ m) were prepared as previously described (Wong et al., 2012). Immunohistochemistry was performed as described (Wong et al., 2012) and stained sections were analyzed with a Leica DM4000 fluorescence microscope and Leica software (Leica Microsystems, Buffalo Grove, IL). The color intensity of the images was slightly enhanced using Adobe Photoshop CS4 (Adobe Systems, San Jose, CA) for better visualization. These color enhancements were carried out consistently between all sections while maintaining the integrity of the data. Biotin-anti-E4 was generated in house.

### *Quantification of germinal center frequency and areas by histology*

Immunohistochemistry was performed using the Abs listed in the Immunohistology methods. Images of stained sections were captured using a Leica DM4000 fluorescence microscope and Leica software (Leica Microsystems, Buffalo Grove, IL). To determine the GC frequency, total GC numbers were quantitated in 5 separate 10X field areas per spleen section. For the GC area and fluorescence intensity measurements, 10 GCs/mouse were measured using the LASAF software package.

### **Supplemental References**

- Anders, S., and Huber, W. (2010). Differential expression analysis for sequence count data. *Genome Biol* 11, R106.
- Saldanha, A.J. (2004). Java Treeview--extensible visualization of microarray data. *Bioinformatics* 20, 3246-3248.
- Trapnell, C., and Salzberg, S.L. (2009). How to map billions of short reads onto genomes. *Nat Biotechnol* 27, 455-457.
- Trapnell, C., Williams, B.A., Pertea, G., Mortazavi, A., Kwan, G., van Baren, M.J., Salzberg, S.L., Wold, B.J., and Pachter, L. (2010). Transcript assembly and quantification by RNA-Seq reveals unannotated transcripts and isoform switching during cell differentiation. *Nat Biotechnol* 28, 511-515.
- Wong, E.B., Khan, T.N., Mohan, C., and Rahman, Z.S. (2012). The Lupus-Prone NZM2410/NZW Strain-Derived Sle1b Sublocus Alters the Germinal Center Checkpoint in Female Mice in a B Cell-Intrinsic Manner. *J Immunol* 189, 5667-5681.
